# Supplementary material for: Statistical descriptors to measure the effectiveness of hydrogen bonding groups and an example of ether oxygen
Source: Royal Society of Chemistry journal article supplement (doi:10.1039/c1ce05034f), 2011-01-01
Supplement: c1ce05034f.pdf [file c1ce05034f.pdf]

**Supplementary Table 1b** Statistics for competitiveness for ether oxygen<sup>\*</sup> relative to other groups. (HB acceptor: Z-O-Z, HB donor: Z-H excluding methyl donors). Footnotes same as described in Table 1a.

|    | <b>Acceptor - 1</b><br>(HB group for evaluating competitiveness) <sup>@</sup> | <b>Acceptor- 2</b><br>(co-existing HB group) <sup>@</sup> | Fragments in CSD (N1) | Hydrogen-bonded fragments <sup>§</sup> (N2) | Exclusive hydrogen-bonded fragments <sup>§</sup> (N3) | <b>ASC<sup>§</sup></b><br>(%) | <b>RSC<sup>§</sup></b><br>(%) | <b>ESC<sup>§</sup></b><br>(%) | Mean H...A distance(Å) /D-H...A angle(°) <sup>#</sup> |
|----|-------------------------------------------------------------------------------|-----------------------------------------------------------|-----------------------|---------------------------------------------|-------------------------------------------------------|-------------------------------|-------------------------------|-------------------------------|-------------------------------------------------------|
| a) | Carbonyl                                                                      | -                                                         | 70454                 | 41408                                       | -                                                     | 59                            | -                             | -                             | 2.26/151                                              |
| b) | One-ether                                                                     | -                                                         | 64928                 | 18682                                       | -                                                     | 29                            | -                             | -                             | 2.41/149                                              |
| c) | Two-ether                                                                     | -                                                         | 33933                 | 10878                                       | -                                                     | 32                            | -                             | -                             | 2.41/149                                              |
| d) | Three-ether                                                                   | -                                                         | 14889                 | 4974                                        | -                                                     | 33                            | -                             | -                             | 2.42/149                                              |
| e) | Carbonyl in ester                                                             | Ether                                                     | 30429                 | 15070                                       | 11699                                                 | 50                            | 78                            | 38                            | 2.36/149                                              |
| f) | Ether in ester                                                                | Carbonyl                                                  | 30429                 | 4412                                        | 540                                                   | 14                            | 22                            | 2                             | 2.48/149                                              |
| g) | Ether excluding ester                                                         | -                                                         | 34499                 | 12041                                       | -                                                     | 35                            | -                             | -                             | 2.39/149                                              |
| h) | One-ether                                                                     | Pyridine                                                  | 2521                  | 778                                         | 422                                                   | 31                            | 44                            | 17                            | 2.44/148                                              |
| i) | Two-ether                                                                     | Pyridine                                                  | 1126                  | 383                                         | 212                                                   | 34                            | 48                            | 19                            | 2.45/148                                              |
| j) | Three-ether                                                                   | Pyridine                                                  | 449                   | 194                                         | 110                                                   | 43                            | 57                            | 24                            | 2.44/149                                              |
| k) | Pyridine                                                                      | One-ether                                                 | 2521                  | 998                                         | 586                                                   | 40                            | 56                            | 23                            | 2.25/157                                              |
| l) | Pyridine                                                                      | Two-ether                                                 | 1126                  | 412                                         | 200                                                   | 37                            | 52                            | 18                            | 2.30/155                                              |
| m) | Pyridine                                                                      | Three-ether                                               | 449                   | 150                                         | 44                                                    | 33                            | 43                            | 10                            | 2.31/155                                              |
| n) | One-ether                                                                     | =N-                                                       | 13498                 | 3687                                        | 2303                                                  | 27                            | 51                            | 17                            | 2.42/148                                              |
| o) | Two-ether                                                                     | =N-                                                       | 5913                  | 1903                                        | 1239                                                  | 32                            | 58                            | 21                            | 2.42/149                                              |
| p) | Three-ether                                                                   | =N-                                                       | 2348                  | 783                                         | 543                                                   | 33                            | 62                            | 23                            | 2.41/149                                              |
| q) | =N-                                                                           | One-ether                                                 | 13498                 | 3492                                        | 1951                                                  | 26                            | 49                            | 14                            | 2.30/154                                              |
| r) | =N-                                                                           | Two-ether                                                 | 5913                  | 1361                                        | 589                                                   | 23                            | 42                            | 10                            | 2.34/153                                              |
| s) | =N-                                                                           | Three-ether                                               | 2348                  | 480                                         | 170                                                   | 20                            | 38                            | 7                             | 2.34/153                                              |

**Supplementary Table 1c** Statistics for competitiveness for ether oxygen\* relative to other groups. (HB acceptor: C-O-C, HB donor: Z-H). Footnotes same as described in Table 1a.

|    | <b>Acceptor - 1</b><br>(HB group for evaluating competitiveness) <sup>@</sup> | <b>Acceptor- 2</b><br>(co-existing HB group) <sup>@</sup> | Fragments in CSD (N1) | Hydrogen-bonded fragments <sup>§</sup> (N2) | Exclusive hydrogen-bonded fragments <sup>§</sup> (N3) | <b>ASC<sup>§</sup></b><br>(%) | <b>RSC<sup>§</sup></b><br>(%) | <b>ESC<sup>§</sup></b><br>(%) | Mean H...A distance(Å) /D-H...A angle(°) <sup>#</sup> |
|----|-------------------------------------------------------------------------------|-----------------------------------------------------------|-----------------------|---------------------------------------------|-------------------------------------------------------|-------------------------------|-------------------------------|-------------------------------|-------------------------------------------------------|
| a) | One-COC                                                                       | -                                                         | 57385                 | 23450                                       | -                                                     | 41                            | -                             | -                             | 2.43 / 149                                            |
| b) | Two-COC                                                                       | -                                                         | 30229                 | 15257                                       | -                                                     | 50                            | -                             | -                             | 2.44 / 149                                            |
| c) | Three-COC                                                                     | -                                                         | 13255                 | 7867                                        | -                                                     | 59                            | -                             | -                             | 2.44 / 149                                            |
| d) | One-COC                                                                       | Pyridine                                                  | 2190                  | 863                                         | 424                                                   | 39                            | 45                            | 19                            | 2.46 / 148                                            |
| e) | Two-COC                                                                       | Pyridine                                                  | 1026                  | 481                                         | 255                                                   | 47                            | 52                            | 25                            | 2.46 / 148                                            |
| f) | Three-COC                                                                     | Pyridine                                                  | 413                   | 259                                         | 143                                                   | 63                            | 61                            | 35                            | 2.45 / 148                                            |
| g) | Pyridine                                                                      | One-COC                                                   | 2190                  | 1045                                        | 606                                                   | 48                            | 55                            | 28                            | 2.28 / 156                                            |
| h) | Pyridine                                                                      | Two-COC                                                   | 1026                  | 453                                         | 227                                                   | 44                            | 48                            | 22                            | 2.33 / 155                                            |
| i) | Pyridine                                                                      | Three-COC                                                 | 413                   | 171                                         | 55                                                    | 41                            | 39                            | 13                            | 2.33 / 155                                            |
| j) | One-COC                                                                       | =N-                                                       | 11239                 | 4070                                        | 2612                                                  | 36                            | 54                            | 23                            | 2.43 / 149                                            |
| k) | Two-COC                                                                       | =N-                                                       | 4805                  | 2304                                        | 1550                                                  | 48                            | 63                            | 32                            | 2.44 / 149                                            |
| l) | Three-COC                                                                     | =N-                                                       | 1851                  | 1017                                        | 712                                                   | 55                            | 68                            | 38                            | 2.43 / 149                                            |
| m) | =N-                                                                           | One-COC                                                   | 11239                 | 3433                                        | 1975                                                  | 31                            | 46                            | 18                            | 2.33 / 154                                            |
| n) | =N-                                                                           | Two-COC                                                   | 4805                  | 1362                                        | 608                                                   | 28                            | 37                            | 13                            | 2.37 / 153                                            |
| o) | =N-                                                                           | Three-COC                                                 | 1851                  | 479                                         | 174                                                   | 26                            | 32                            | 9                             | 2.39 / 152                                            |

**Supplementary Table 1d** Statistics for competitiveness for ether oxygen<sup>\*</sup> relative to other groups. (HB acceptor: C-S-C, HB donor: Z-H). Footnotes same as described in Table 1a.

|    | <b>Acceptor - 1</b><br>(HB group for evaluating competitiveness) <sup>@</sup> | <b>Acceptor- 2</b><br>(co-existing HB group) <sup>@</sup> | Fragments in CSD (N1) | Hydrogen-bonded fragments (N2) | Exclusive hydrogen-bonded fragments (N3) | <b>ASC<sup>§</sup></b><br>(%) | <b>RSC<sup>§</sup></b><br>(%) | <b>ESC<sup>§</sup></b><br>(%) | Mean H...A distance(Å) /D-H...A angle(°) <sup>#</sup> |
|----|-------------------------------------------------------------------------------|-----------------------------------------------------------|-----------------------|--------------------------------|------------------------------------------|-------------------------------|-------------------------------|-------------------------------|-------------------------------------------------------|
| a) | One-CSC                                                                       | -                                                         | 11562                 | 2735                           | -                                        | 24                            | -                             | -                             | 2.80 / 149                                            |
| b) | Two-CSC                                                                       | -                                                         | 3792                  | 1290                           | -                                        | 34                            | -                             | -                             | 2.80 / 149                                            |
| c) | Three-CSC                                                                     | -                                                         | 1243                  | 568                            | -                                        | 46                            | -                             | -                             | 2.80 / 149                                            |
| d) | One-CSC                                                                       | Pyridine                                                  | 689                   | 190                            | 85                                       | 28                            | 36                            | 12                            | 2.80 / 149                                            |
| e) | Two-CSC                                                                       | Pyridine                                                  | 240                   | 96                             | 43                                       | 40                            | 44                            | 18                            | 2.80 / 149                                            |
| f) | Three-CSC                                                                     | Pyridine                                                  | 67                    | 31                             | 12                                       | 46                            | 42                            | 18                            | 2.80 / 149                                            |
| g) | Pyridine                                                                      | One-CSC                                                   | 689                   | 336                            | 231                                      | 49                            | 64                            | 34                            | 2.33 / 155                                            |
| h) | Pyridine                                                                      | Two-CSC                                                   | 240                   | 123                            | 70                                       | 51                            | 56                            | 29                            | 2.43 / 154                                            |
| i) | Pyridine                                                                      | Three-CSC                                                 | 67                    | 43                             | 24                                       | 64                            | 58                            | 36                            | 2.44 / 153                                            |
| j) | One-CSC                                                                       | =N-                                                       | 3867                  | 683                            | 385                                      | 18                            | 31                            | 10                            | 2.80 / 148                                            |
| k) | Two-CSC                                                                       | =N-                                                       | 768                   | 209                            | 131                                      | 27                            | 43                            | 17                            | 2.80 / 149                                            |
| l) | Three-CSC                                                                     | =N-                                                       | 131                   | 50                             | 33                                       | 38                            | 53                            | 25                            | 2.80 / 151                                            |
| m) | =N-                                                                           | One-CSC                                                   | 3867                  | 1558                           | 1260                                     | 40                            | 69                            | 33                            | 2.31 / 156                                            |
| n) | =N-                                                                           | Two-CSC                                                   | 768                   | 274                            | 196                                      | 36                            | 57                            | 26                            | 2.40 / 153                                            |
| o) | =N-                                                                           | Three-CSC                                                 | 131                   | 45                             | 28                                       | 34                            | 47                            | 21                            | 2.49 / 154                                            |

**Supplementary Table 1e** Statistics for competitiveness for ether oxygen\* relative to other groups. (HB acceptor: Z-O-Z, HB donor: C-H). Footnotes same as described in Table 1a.

|    | <b>Acceptor - 1</b><br>(HB group for evaluating competitiveness) <sup>@</sup> | <b>Acceptor- 2</b><br>(co-existing HB group) <sup>@</sup> | Fragments in CSD (N1) | Hydrogen-bonded fragments (N2) | Exclusive hydrogen-bonded fragments (N3) | <b>ASC<sup>s</sup></b><br>(%) | <b>RSC<sup>s</sup></b><br>(%) | <b>ESC<sup>s</sup></b><br>(%) | Mean H...A distance(Å) /D-H...A angle(°) <sup>#</sup> |
|----|-------------------------------------------------------------------------------|-----------------------------------------------------------|-----------------------|--------------------------------|------------------------------------------|-------------------------------|-------------------------------|-------------------------------|-------------------------------------------------------|
| a) | Carbonyl                                                                      | -                                                         | 70084                 | 49686                          | -                                        | 71                            | -                             | -                             | 2.46 / 147                                            |
| b) | One-ether                                                                     | -                                                         | 64779                 | 23562                          | -                                        | 36                            | -                             | -                             | 2.49 / 149                                            |
| c) | two-ether                                                                     | -                                                         | 33866                 | 15688                          | -                                        | 46                            | -                             | -                             | 2.49 / 149                                            |
| d) | three-ether                                                                   | -                                                         | 14860                 | 8245                           | -                                        | 55                            | -                             | -                             | 2.49 / 149                                            |
| e) | Carbonyl in ester                                                             | Ether                                                     | 30402                 | 20451                          | 15419                                    | 67                            | 77                            | 51                            | 2.47 / 147                                            |
| f) | Ether in ester                                                                | Carbonyl                                                  | 30402                 | 6172                           | 1140                                     | 20                            | 23                            | 4                             | 2.50 / 150                                            |
| g) | Ether excluding ester                                                         | -                                                         | 34377                 | 13748                          | -                                        | 40                            | -                             | -                             | 2.48 / 149                                            |
| h) | One-ether                                                                     | Pyridine                                                  | 2521                  | 933                            | 640                                      | 37                            | 57                            | 25                            | 2.48 / 148                                            |
| i) | Two-ether                                                                     | Pyridine                                                  | 1126                  | 515                            | 333                                      | 46                            | 59                            | 30                            | 2.48 / 148                                            |
| j) | Three-ether                                                                   | Pyridine                                                  | 449                   | 273                            | 179                                      | 61                            | 67                            | 40                            | 2.48 / 148                                            |
| k) | Pyridine                                                                      | One-ether                                                 | 2521                  | 713                            | 420                                      | 28                            | 43                            | 17                            | 2.51 / 152                                            |
| l) | Pyridine                                                                      | Two-ether                                                 | 1126                  | 356                            | 174                                      | 32                            | 41                            | 15                            | 2.50 / 153                                            |
| m) | Pyridine                                                                      | Three-ether                                               | 449                   | 136                            | 42                                       | 30                            | 33                            | 9                             | 2.50 / 153                                            |
| n) | One-ether                                                                     | =N-                                                       | 13440                 | 4485                           | 3394                                     | 33                            | 62                            | 25                            | 2.48 / 149                                            |
| o) | Two-ether                                                                     | =N-                                                       | 5876                  | 2622                           | 1973                                     | 45                            | 68                            | 34                            | 2.48 / 149                                            |
| p) | Three-ether                                                                   | =N-                                                       | 2327                  | 1214                           | 914                                      | 52                            | 71                            | 39                            | 2.48 / 149                                            |
| q) | =N-                                                                           | One-ether                                                 | 13440                 | 2717                           | 1626                                     | 20                            | 38                            | 12                            | 2.52 / 151                                            |
| r) | =N-                                                                           | Two-ether                                                 | 5876                  | 1238                           | 589                                      | 21                            | 32                            | 10                            | 2.52 / 151                                            |
| s) | =N-                                                                           | Three-ether                                               | 2327                  | 490                            | 190                                      | 21                            | 29                            | 8                             | 2.52 / 151                                            |

**Supplementary Table 1f** Statistics for competitiveness for ether oxygen\* relative to other groups. (HB acceptor: Z-O-Z, HB donor: N-H). Footnotes same as described in Table 1a.

|    | <b>Acceptor - 1</b><br>(HB group for evaluating competitiveness)@ | <b>Acceptor- 2</b><br>(co-existing HB group)@ | Fragments in CSD (N1) | Hydrogen-bonded fragments (N2) | Exclusive hydrogen-bonded fragments (N3) | <b>ASC</b> <sup>§</sup><br>(%) | <b>RSC</b> <sup>§</sup><br>(%) | <b>ESC</b> <sup>§</sup><br>(%) | Mean H...A distance(Å) /D-H...A angle(°)# |
|----|-------------------------------------------------------------------|-----------------------------------------------|-----------------------|--------------------------------|------------------------------------------|--------------------------------|--------------------------------|--------------------------------|-------------------------------------------|
| a) | Carbonyl                                                          | -                                             | 23102                 | 14280                          | -                                        | 62                             | -                              | -                              | 2.00 / 158                                |
| b) | One-ether                                                         | -                                             | 14405                 | 1397                           | -                                        | 10                             | -                              | -                              | 2.21 / 149                                |
| c) | Two-ether                                                         | -                                             | 6444                  | 805                            | -                                        | 12                             | -                              | -                              | 2.21 / 150                                |
| d) | Three-ether                                                       | -                                             | 2275                  | 396                            | -                                        | 17                             | -                              | -                              | 2.20 / 151                                |
| e) | Carbonyl in ester                                                 | Ether                                         | 7127                  | 2554                           | 2476                                     | 36                             | 95                             | 35                             | 2.07 / 155                                |
| f) | Ether in ester                                                    | Carbonyl                                      | 7127                  | 157                            | 79                                       | 2                              | 5                              | 1                              | 2.38 / 141                                |
| g) | Ether excluding ester                                             | -                                             | 7278                  | 1058                           | -                                        | 15                             | -                              | -                              | 2.20 / 150                                |
| h) | One-ether                                                         | Pyridine                                      | 737                   | 48                             | 38                                       | 7                              | 21                             | 5                              | 2.24 / 149                                |
| i) | Two-ether                                                         | Pyridine                                      | 298                   | 27                             | 22                                       | 9                              | 31                             | 7                              | 2.23 / 150                                |
| j) | Three-ether                                                       | Pyridine                                      | 102                   | 15                             | 13                                       | 15                             | 47                             | 13                             | 2.22 / 153                                |
| k) | Pyridine                                                          | One-ether                                     | 737                   | 190                            | 180                                      | 26                             | 79                             | 24                             | 2.10 / 161                                |
| l) | Pyridine                                                          | Two-ether                                     | 298                   | 59                             | 54                                       | 20                             | 69                             | 18                             | 2.13 / 158                                |
| m) | Pyridine                                                          | Three-ether                                   | 102                   | 17                             | 15                                       | 17                             | 53                             | 15                             | 2.17 / 155                                |
| n) | One-ether                                                         | =N-                                           | 4267                  | 411                            | 297                                      | 10                             | 32                             | 7                              | 2.25 / 145                                |
| o) | Two-ether                                                         | =N-                                           | 1709                  | 211                            | 159                                      | 12                             | 39                             | 9                              | 2.23 / 147                                |
| p) | Three-ether                                                       | =N-                                           | 632                   | 88                             | 66                                       | 14                             | 45                             | 10                             | 2.23 / 149                                |
| q) | =N-                                                               | One-ether                                     | 4267                  | 911                            | 797                                      | 21                             | 68                             | 19                             | 2.11 / 158                                |
| r) | =N-                                                               | Two-ether                                     | 1709                  | 331                            | 279                                      | 19                             | 61                             | 16                             | 2.12 / 158                                |
| s) | =N-                                                               | Three-ether                                   | 632                   | 109                            | 87                                       | 17                             | 55                             | 14                             | 2.11 / 159                                |

**Supplementary Table 1g** Statistics for competitiveness for ether oxygen<sup>\*</sup> relative to other groups. (HB acceptor: Z-O-Z, HB donor: O-H). Footnotes same as described in Table 1a.

|    | Acceptor - 1<br>(HB group for evaluating competitiveness)<br>@ | Acceptor- 2<br>(co-existing HB group)@ | Fragments in CSD (N1) | Hydrogen-bonded fragments (N2) | Exclusive hydrogen-bonded fragments (N3) | ASC <sup>s</sup> (%) | RSC <sup>s</sup> (%) | ESC <sup>s</sup> (%) | Mean H...A distance(Å) /D-H...A angle(°)# |
|----|----------------------------------------------------------------|----------------------------------------|-----------------------|--------------------------------|------------------------------------------|----------------------|----------------------|----------------------|-------------------------------------------|
| a) | Carbonyl                                                       |                                        | 23397                 | 13911                          | -                                        | 59                   | -                    | -                    | 1.86/161                                  |
| b) | One-ether                                                      |                                        | 18618                 | 3272                           | -                                        | 18                   | -                    | -                    | 2.06/151                                  |
| c) | Two-ether                                                      |                                        | 8934                  | 1932                           | -                                        | 22                   | -                    | -                    | 2.08/150                                  |
| d) | Three-ether                                                    |                                        | 3962                  | 964                            | -                                        | 24                   | -                    | -                    | 2.10/148                                  |
| e) | Carbonyl in ester                                              | Ether                                  | 7950                  | 3207                           | 3029                                     | 40                   | 91                   | 38                   | 1.94/158                                  |
| f) | Ether in ester                                                 | Carbonyl                               | 7950                  | 286                            | 108                                      | 4                    | 9                    | 1                    | 2.22/144                                  |
| g) | Ether excluding ester                                          | -                                      | 10668                 | 2521                           | -                                        | 24                   | -                    | -                    | 2.05/151                                  |
| h) | One-ether                                                      | Pyridine                               | 617                   | 71                             | 33                                       | 12                   | 19                   | 5                    | 2.12/147                                  |
| i) | Two-ether                                                      | Pyridine                               | 267                   | 36                             | 16                                       | 13                   | 25                   | 6                    | 2.21/143                                  |
| j) | Three-ether                                                    | Pyridine                               | 111                   | 24                             | 11                                       | 22                   | 37                   | 10                   | 2.22/143                                  |
| k) | Pyridine                                                       | One-ether                              | 617                   | 306                            | 268                                      | 50                   | 81                   | 43                   | 1.89/162                                  |
| l) | Pyridine                                                       | Two-ether                              | 267                   | 107                            | 87                                       | 40                   | 75                   | 33                   | 1.93/160                                  |
| m) | Pyridine                                                       | Three-ether                            | 111                   | 42                             | 29                                       | 38                   | 63                   | 26                   | 1.94/160                                  |
| n) | One-ether                                                      | =N-                                    | 3160                  | 425                            | 278                                      | 13                   | 30                   | 9                    | 2.10/149                                  |
| o) | Two-ether                                                      | =N-                                    | 1283                  | 242                            | 176                                      | 19                   | 45                   | 14                   | 2.09/149                                  |
| p) | Three-ether                                                    | =N-                                    | 488                   | 103                            | 78                                       | 21                   | 51                   | 16                   | 2.10/150                                  |
| q) | =N-                                                            | One-ether                              | 3160                  | 944                            | 797                                      | 30                   | 70                   | 25                   | 1.99/158                                  |
| r) | =N-                                                            | Two-ether                              | 1283                  | 289                            | 223                                      | 23                   | 55                   | 17                   | 2.00/157                                  |
| s) | =N-                                                            | Three-ether                            | 488                   | 97                             | 72                                       | 20                   | 49                   | 15                   | 2.01/157                                  |

**Supplementary Table 1h** Statistics for competitiveness for ether oxygen<sup>\*</sup> relative to other groups. (HB acceptor: Z-O-Z, HB donor: methyl group). Footnotes same as described in Table 1a.

|        | Acceptor - 1<br>(HB group for<br>evaluating<br>competitiveness)<br>@ | Acceptor<br>-2<br>(co-<br>existing<br>HB<br>group)@ | Fragment<br>s in CSD<br>(N1) | Hydrogen-<br>bonded<br>fragments<br>§<br>(N2) | Exclusive<br>hydrogen-<br>bonded<br>fragments<br>§<br>(N3) | ASC<br>\$<br>(%) | RSC<br>\$<br>(%) | ESC<br>\$<br>(%) | Mean<br>H...A<br>distance(Å<br>) / D-H...A<br>angle(°)# |
|--------|----------------------------------------------------------------------|-----------------------------------------------------|------------------------------|-----------------------------------------------|------------------------------------------------------------|------------------|------------------|------------------|---------------------------------------------------------|
| a)     | Carbonyl                                                             | -                                                   | 53830                        | 17332                                         | -                                                          | 32               | -                | -                | 2.48/149                                                |
| b)     | One-ether                                                            | -                                                   | 52855                        | 7648                                          | -                                                          | 14               | -                | -                | 2.50/150                                                |
| c)     | Two-ether                                                            | -                                                   | 29006                        | 6060                                          | -                                                          | 21               | -                | -                | 2.50/149                                                |
| d)     | Three-ether                                                          | -                                                   | 12913                        | 3757                                          | -                                                          | 29               | -                | -                | 2.49/149                                                |
| e)     | Carbonyl in ester                                                    | Ether                                               | 27392                        | 7900                                          | 6813                                                       | 29               | 78               | 25               | 2.48/149                                                |
| f)     | Ether in ester                                                       | Carbonyl                                            | 27392                        | 2099                                          | 1012                                                       | 8                | 22               | 4                | 2.51/150                                                |
| g)     | Ether excluding<br>ester                                             | -                                                   | 25463                        | 3894                                          | -                                                          | 15               | -                | -                | 2.50/150                                                |
| h)     | One-ether                                                            | Pyridine                                            | 1822                         | 232                                           | 203                                                        | 13               | 65               | 11               | 2.50/148                                                |
| i)     | Two-ether                                                            | Pyridine                                            | 827                          | 161                                           | 137                                                        | 19               | 68               | 17               | 2.49/148                                                |
| j)     | Three-ether                                                          | Pyridine                                            | 295                          | 94                                            | 79                                                         | 32               | 73               | 27               | 2.50/147                                                |
| k)     | Pyridine                                                             | One-ether                                           | 1822                         | 132                                           | 103                                                        | 7                | 35               | 6                | 2.52/153                                                |
| l)     | Pyridine                                                             | Two-ether                                           | 827                          | 78                                            | 54                                                         | 9                | 32               | 7                | 2.52/155                                                |
| m<br>) | Pyridine                                                             | Three-<br>ether                                     | 295                          | 34                                            | 19                                                         | 12               | 27               | 6                | 2.51/156                                                |
| n)     | One-ether                                                            | =N-                                                 | 10411                        | 1331                                          | 1186                                                       | 13               | 68               | 11               | 2.50/149                                                |
| o)     | Two-ether                                                            | =N-                                                 | 4855                         | 947                                           | 836                                                        | 20               | 74               | 17               | 2.50/149                                                |
| p)     | Three-ether                                                          | =N-                                                 | 1950                         | 504                                           | 439                                                        | 26               | 76               | 23               | 2.49/149                                                |
| q)     | =N-                                                                  | One-ether                                           | 10411                        | 646                                           | 501                                                        | 6                | 32               | 5                | 2.55/153                                                |
| r)     | =N-                                                                  | Two-ether                                           | 4855                         | 346                                           | 235                                                        | 7                | 26               | 5                | 2.55/151                                                |
| s)     | =N-                                                                  | Three-<br>ether                                     | 1950                         | 158                                           | 93                                                         | 8                | 24               | 5                | 2.54/151                                                |
